# Supplementary material for: Effects of Post-Curing Time on the Mechanical and Color Properties of Three-Dimensional Printed Crown and Bridge Materials
Source: MDPI journal article supplement (doi:10.3390/polym12112762), 2020-11-23
Supplement: s1 [file s1]

### Supporting information

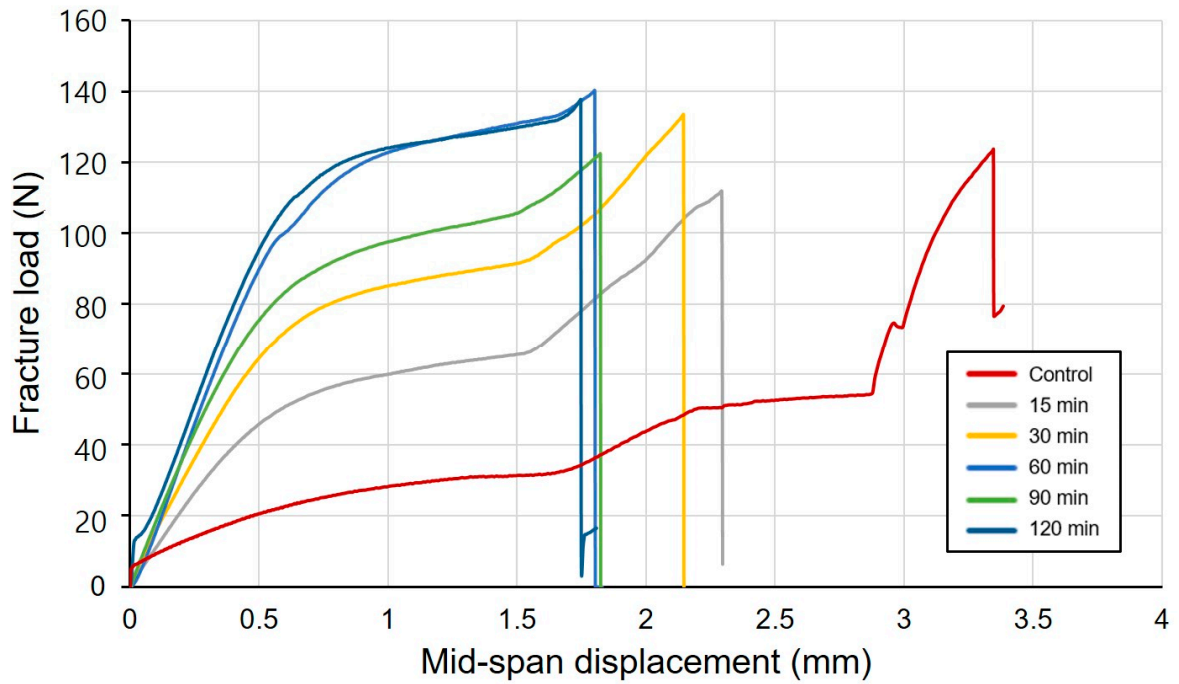

**Figure S1.** Representative curves of fracture load of the 3D printing resin (DIONavi C&B) used in this study. It can be observed that the fracture load continues to increase as the post-curing time increases, and the shorter the post-curing time, the greater the displacement.
